# Supplementary material
Source: publisher site journal article supplement (https://www.dovepress.com/get_supplementary_file.php?f=268901.docx)
Supplement: Supplementary file 1 [file get_supplementary_file.php]

**SUPPLEMENTARY INFORMATION**

**TITLE:** Long-term effectiveness of a home-based pulmonary rehabilitation in older people with Chronic Obstructive Pulmonary Disease: a retrospective study.

**Authors’ full names:** Sarah Gephine1,2, Olivier Le Rouzic3,4, François Machuron5, Benoit Wallaert3, Cécile Chenivesse3,4, Didier Saey2, François Maltais2, Patrick Mucci1 and Jean-Marie Grosbois6.

**Authors’ affiliation(s):**

1Univ. Lille, Univ. Artois, Univ. Littoral Côte d’Opale, ULR 7369 - URePSSS - Unité de Recherche Pluridisciplinaire Sport Santé Société, F-59000 Lille, France.

2Institut universitaire de cardiologie et de pneumologie de Québec, Université Laval, Québec, Canada.

3CHU Lille, Service de Pneumologie et Immuno-Allergologie, Centre de Référence Constitutif des Maladies Pulmonaires Rares, F-59000 Lille, France.

4Univ. Lille, F-59000 Lille, France.

5Univ. Lille, CHU Lille, EA 2694 - Santé Publique : Épidémiologie et Qualité des Soins, Department of Biostatistics, F-59000 Lille, France.

6FormAction Santé, Pérenchies, France.

**Table S1**. Detailed PR responders according to age.

|  | **≤ 70 year** | | | **> 70 years** | | |
| --- | --- | --- | --- | --- | --- | --- |
|  | **M2.** | **M8.** | **M14.** | **M2.** | **M8.** | **M14.** |
| N (%) |
| One outcome | 300 (88) | 246 (72) | 224 (66) | 110 (79)* | 90 (64) | 79 (57) |
| Two outcomes | 236 (69) | 176 (52) | 163 (48) | 86 (62) | 61 (44) | 48 (34)** |
| Three outcomes | 150 (44) | 99 (29) | 95 (28) | 56 (40) | 34 (24) | 30 (22) |

Data are presented as number (%).

*p<0.05 and **p<0.01 number of responders significantly different between groups.
